# Supplementary material for: Tunable Enzyme-Assisted Mineralization of Apatitic Calcium Phosphate by Homogeneous Catalysis
Source: MDPI journal article supplement (doi:10.3390/ijms24010043), 2022-12-20
Supplement: s1 [file s1]

# Tunable Enzyme-Assisted Mineralization of Apatitic Calcium Phosphate by Homogeneous Catalysis

## *Supplementary Materials*

Brittany Foley <sup>1,2</sup>, Clément Guibert <sup>2</sup>, Mohamed Selmane <sup>3</sup>, Alberto Mezzetti <sup>2</sup>, Caroline Lefebvre <sup>4</sup>, Karim El Kirat <sup>1</sup> and Jessem Landoulsi <sup>1,2,\*</sup>

---

## Table of Contents

---

Figure S1 – Calibration curve for measurement of enzymatic activity

Figure S2 – Initial enzymatic activity measured with respect to variable amount of enzymatic substrate introduced (A) and variable amount of fluoride introduced (B)

Figure S3 – Curve-fitting of the  $\nu_2$   $\text{CO}_3^{2-}$  bands of infrared spectra for substituted hydroxyapatite prepared via enzyme-assisted mineralization with variable  $[\text{S}]_0$

Figure S4 – Selected X-ray powder diffraction patterns of substituted hydroxyapatite synthesized via chemical precipitation at 37°C, pH 7.4 using variable concentration of  $\text{P}_i$

Figure S5 – Selected ATR-FTIR spectra of substituted hydroxyapatite synthesized by direct precipitation in solution using a range of initial concentrations of  $\text{P}_i$

Figure S6 – Comparative plots for unit cell dimensions and relative carbonate content of substituted HAP synthesized by direct precipitation and enzyme-assisted mineralization

Figure S7 – Plot of fluoride content detected by XPS versus fluoride introduced during synthesis,  $[\text{F}^-]_0$

Table S1 – Table of crystallographic lattice parameters determined by Rietveld refinement of X-ray powder diffraction data for samples synthesized by enzymatic catalysis with and without fluoride

Table S2 – Table of IR absorption band assignments

Table S3 – Table of crystallographic lattice parameters determined by Rietveld refinement of X-ray powder diffraction data for samples synthesized by chemical mineralization via direct precipitation in solution

Method S1 – Mineralization procedure for chemical mineralization

Figure S1

---

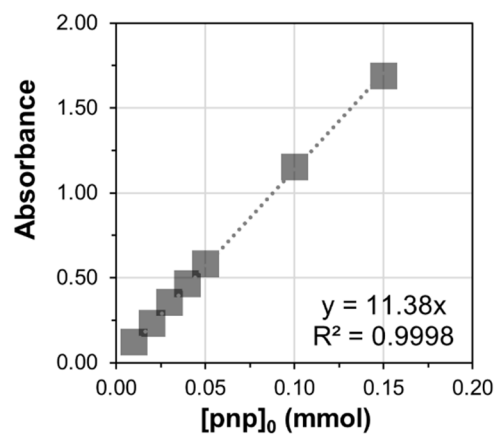

**Figure S1.** Calibration curve used for determination of the kinetic profile of the ALP-catalyzed reaction, measured from the absorbance of pnp solutions prepared over a relevant range of concentrations.

Figure S2

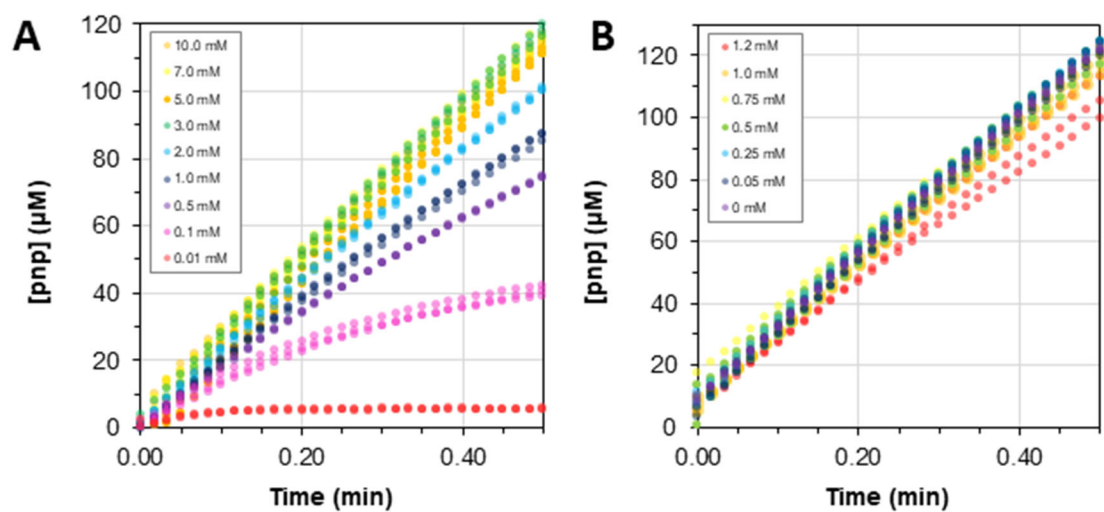

**Figure S2.** (A) Initial enzymatic activity measured with respect to the amount of pnpp introduced,  $[pnpp]_0$ , and (B) the amount of fluoride introduced,  $[F^-]_0$ , when  $[pnpp]_0 = 7.0$  mM.

Figure S3

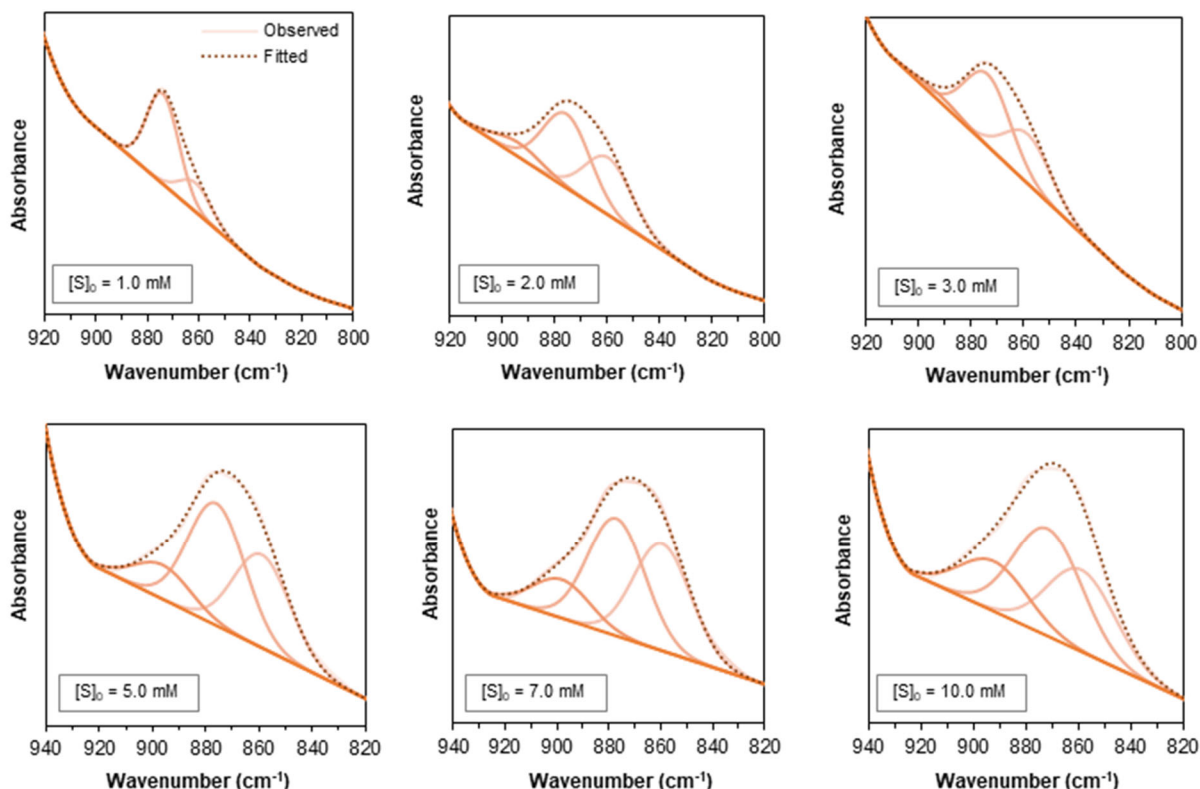

**Figure S3.** Curve-fitting of the  $\nu_2$   $\text{CO}_3^{2-}$  bands of selected infrared spectra for substituted hydroxyapatite prepared via enzyme-assisted mineralization with variable  $[\text{S}]_0$ .

The  $\nu_2$   $\text{CO}_3^{2-}$  region is fitted using either (A,B) two or (C) three components, the assignment of which were guided by second-derivative spectra and informed by consideration of the literature (See Table S1). A component at approximately  $894\text{ cm}^{-1}$  is assigned to Type A carbonate substitution, which corresponds to the substitution of  $\text{OH}^-$  by  $\text{CO}_3^{2-}$  ions in the  $c$ -axis channel of the lattice; a component at approximately  $874\text{ cm}^{-1}$  is assigned to Type B carbonate substitution, which refers to its substitution of a tetrahedral  $\text{PO}_4^{3-}$ ; a component around  $858\text{ cm}^{-1}$  is assigned to labile carbonate, i.e.  $\text{CO}_3^{2-}$  ions localized at the surface without being incorporated into the lattice.

Figure S4

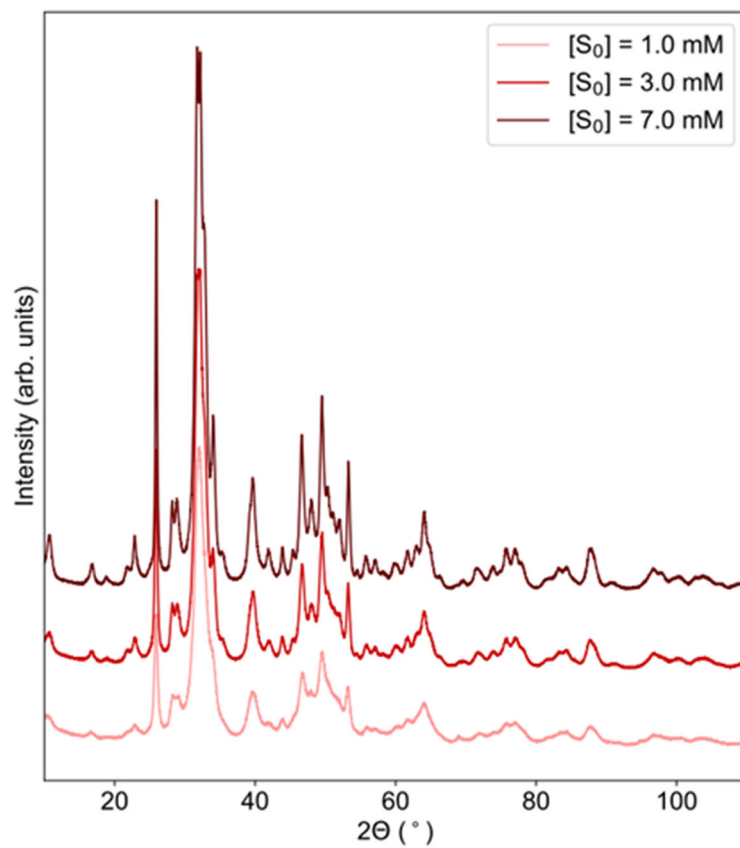

**Figure S4.** X-ray powder diffraction patterns for substituted hydroxyapatites synthesized via chemical precipitation at 37°C, pH 7.4 using variable concentrations of  $P_i$ .

Figure S5

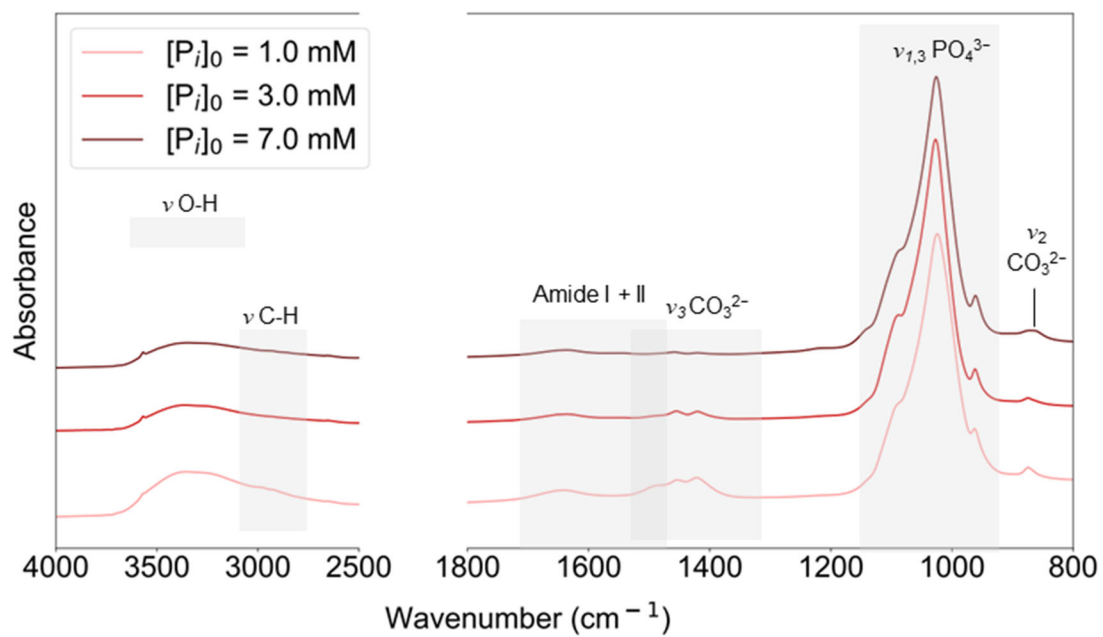

**Figure S5.** Selected ATR-FTIR spectra of substituted hydroxyapatite synthesized by direct precipitation in solution using a range of initial concentrations of  $\text{Na}_2\text{HPO}_4$ .

Figure S6

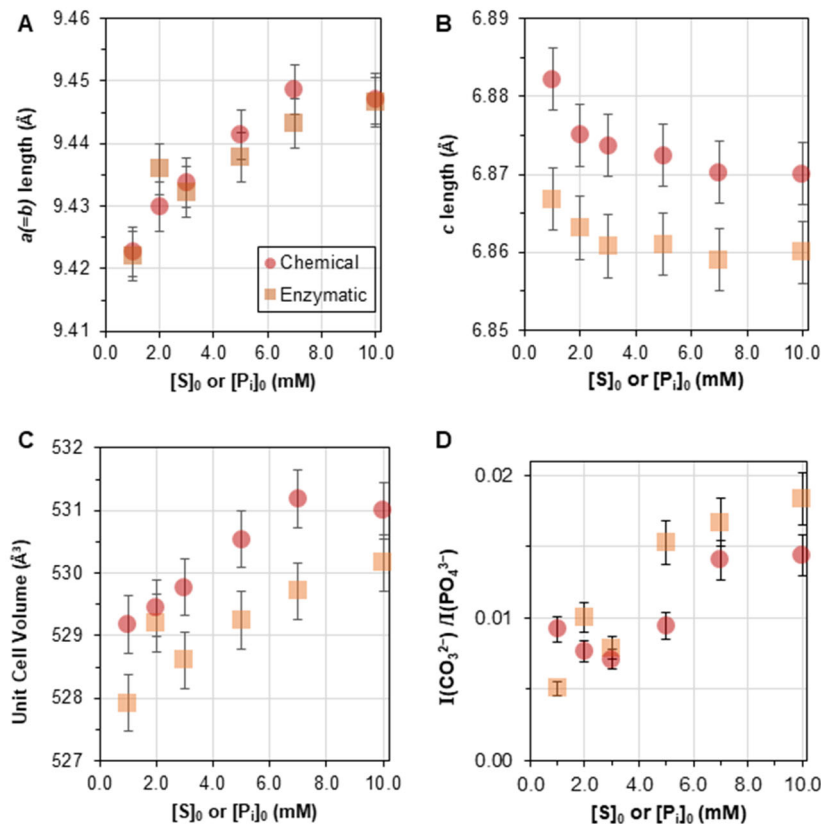

**Figure S6.** Comparative plots for unit cell dimensions of substituted HAP synthesized by direct precipitation (“chemical,” red) compared to homogeneous enzymatic catalysis using ALP (“enzymatic,” orange squares). (A,B) Lengths of unit cell parameters were determined by Rietveld refinement of X-ray powder diffraction data (C) unit cell volume calculated from the lattice parameters, and (D) carbonate-to-phosphate ratio,  $I(\text{CO}_3^{2-})/I(\text{PO}_4^{3-})$ , determined from IR spectra.

Overall,  $a(=b)$  lattice parameters measured for chemically synthesized mineral trend similarly with respect to  $[P_i]$  available during synthesis compared to enzymatically synthesized mineral with respect to  $[S]_0$  used (Figure S5A). The  $c$  lattice parameters also appear affected, showing a slight decrease with increasing  $[S]_0$  in Figure S5B. Unit cell volume shows a similar trend to the enzyme-assisted mineralization but with increased volumes for the chemical synthesis (Figure S5C), but then plateau at higher concentrations of supplied phosphate (7, 10 mM). Carbonate-to-phosphate ratio showed a consistent trend at higher values of  $[P_i]_0$  but was inconsistent at  $[P_i]_0 < 3.0$  mM.



Figure S7

---

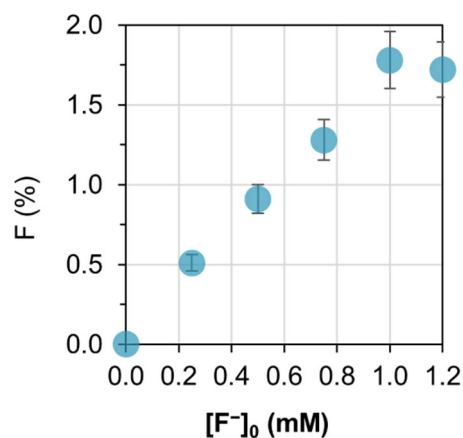

**Figure S7.** Plot of the molar concentration of fluoride measured by XPS (mole fraction (%) computed over the sum of all elements except hydrogen) on CaP solids mineralized using enzyme-assisted mineralization method versus the concentration of fluoride  $[F^-]_0$  initially added in the mineralization solution.

Table S1

---

Table of crystallographic lattice parameters determined by Rietveld refinement of X-ray powder diffraction data for samples synthesized by enzyme-assisted mineralization with and without fluoride.

| Enzyme-assisted Mineralization |          |          |                   |          |          |
|--------------------------------|----------|----------|-------------------|----------|----------|
| $[S]_0$                        | $a(=b)$  | $c$      | $[F^-]_0^\dagger$ | $a(=b)$  | $c$      |
| (mM)                           | (Å)      | (Å)      | (mM)              | (Å)      | (Å)      |
| 1                              | 9.422(4) | 6.867(1) | 0                 | 9.452(4) | 6.865(1) |
| 2                              | 9.436(4) | 6.863(1) | 0.25              | 9.430(4) | 6.869(1) |
| 3                              | 9.432(4) | 6.861(1) | 0.5               | 9.416(4) | 6.871(1) |
| 5                              | 9.438(4) | 6.861(1) | 0.75              | 9.400(4) | 6.873(1) |
| 7                              | 9.443(4) | 6.859(1) | 1                 | 9.390(4) | 6.875(1) |
| 10                             | 9.447(4) | 6.860(1) | 1.2               | 9.389(4) | 6.875(1) |

$^\dagger [S]_0 = 7mM$

**Table S1.** Table of crystallographic lattice parameters determined by Rietveld refinement of X-ray powder diffraction data for samples synthesized by enzymatic catalysis with and without fluoride.

Table S2

---

Table of IR absorption band assignments:

| Wavenumber (cm <sup>-1</sup> )          | Assignments                                                      |
|-----------------------------------------|------------------------------------------------------------------|
| 3200-3565                               | $\nu$ O-H                                                        |
| 2800-3100                               | $\nu$ C-H                                                        |
| 1651                                    | Amide I                                                          |
| 1540                                    | Amide II                                                         |
| 1137-1138                               | HPO <sub>4</sub> <sup>2-</sup>                                   |
| 1099-1100, 1062-1063,<br>1027-1028, 999 | $\nu_3$ PO <sub>4</sub> <sup>3-</sup> asymmetric stretching mode |
| 960-963                                 | $\nu_1$ PO <sub>4</sub> <sup>3-</sup> symmetric stretching mode  |
| 840-890                                 | $\nu_2$ CO <sub>3</sub> <sup>2-</sup>                            |
| 894, 899                                | Type A CO <sub>3</sub> <sup>2-</sup>                             |
| 870, 874                                | Type B CO <sub>3</sub> <sup>2-</sup>                             |
| 855, 858                                | labile CO <sub>3</sub> <sup>2-</sup>                             |

---

**Table S2.** Table of IR absorption band assignments.

Table S3

Table of crystallographic lattice parameters determined by Rietveld refinement of X-ray powder diffraction data for samples synthesized by chemical mineralization via direct precipitation in solution.

| Chemical Mineralization |                            |                 |
|-------------------------|----------------------------|-----------------|
| <b>[Pi]<sub>0</sub></b> | <b><i>a</i>(=<i>b</i>)</b> | <b><i>c</i></b> |
| (mM)                    | (Å)                        | (Å)             |
| 1                       | 9.423(4)                   | 6.882(1)        |
| 2                       | 9.430(4)                   | 6.875(1)        |
| 3                       | 9.434(4)                   | 6.874(1)        |
| 5                       | 9.441(4)                   | 6.872(1)        |
| 7                       | 9.449(4)                   | 6.870(1)        |
| 10                      | 9.447(4)                   | 6.870(1)        |

**Table S3.** Table of crystallographic lattice parameters determined by Rietveld refinement of X-ray powder diffraction data for samples synthesized by chemical mineralization via direct precipitation in solution

## Method S1

---

### Mineralization procedure for chemical mineralization:

Mineralization by direct precipitation (“chemical” method) was performed using  $\text{Na}_2\text{HPO}_4$  and anhydrous  $\text{CaCl}_2$ .  $\text{Na}_2\text{HPO}_4$  was solubilized in 10 mM Tris buffer, pH 7.4 as necessary for final solution target concentrations ( $[\text{P}_i]_0 = 1.0, 2.0, 3.0, 5.0, 7.0, \text{ and } 10.0 \text{ mM}$ ) and brought to near experimental volume, then 1.0 M  $\text{CaCl}_2$  stock solution (prepared in 10.0 mM Tris buffer, pH 7.4) was added to achieve a final concentration of 11.4 mM in the total volume. Solutions were incubated at  $37^\circ\text{C}$  with gentle agitation on a rocker plate for 48 hours. After incubation, solutions were centrifuged and supernatant was decanted. The remaining pellets were washed with equivalent volumes of MilliQ water, centrifuged, and decanted thrice, then dried at  $60^\circ\text{C}$  overnight (16 hours).
